# Supplementary material for: Preparation of large-area ultrathin carbon semiconductors converted from conjugated microporous polymer films
Source: Royal Society of Chemistry journal article supplement (doi:10.1039/c9ra03052b), 2019-01-01
Supplement: c9ra03052b1.pdf [file c9ra03052b1.pdf]

## **Supporting information**

### **Preparation of large-area ultrathin carbon semiconductor**

#### **converted from conjugated microporous polymer film**

Shang Ju,<sup>a</sup> Yamei Ding,<sup>a</sup> Yuhang Yin,<sup>a</sup> Shuai Cheng,<sup>a</sup> Xiangjing Wang,<sup>a</sup> Huiwu Mao,<sup>a</sup> Zhe Zhou,<sup>a</sup>  
Mengya Song,<sup>a</sup> Qing Chang,<sup>a</sup> Chaoyi Ban,<sup>a</sup> Zhengdong Liu,<sup>\*a</sup> and Juqing Liu<sup>\*a</sup>

<sup>a</sup>Key Laboratory of Flexible Electronics (KLOFE) & Institute of Advanced Materials (IAM),  
Nanjing Tech University (NanjingTech), 30 South Puzhu Road, Nanjing 211816, China.

E-mail: iamzdliu@njtech.edu.cn; iamjqliu@njtech.edu.cn

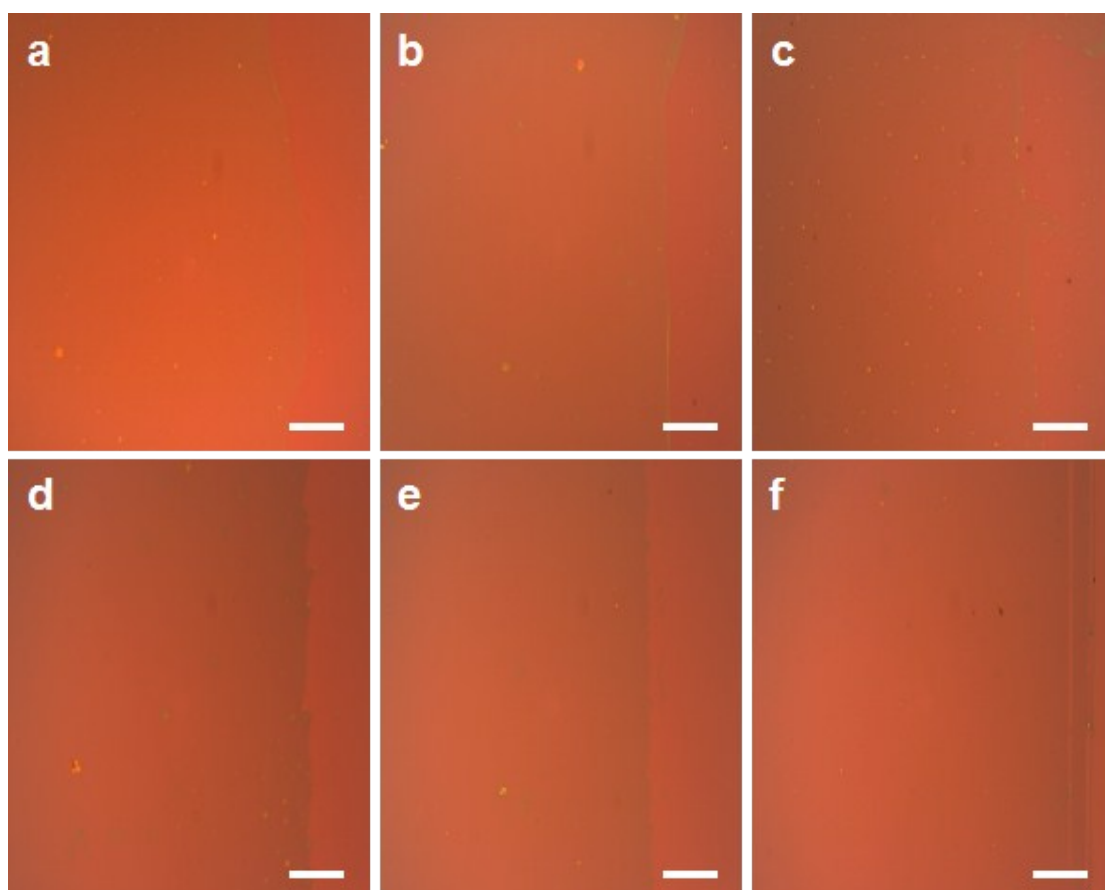

Fig. S1 Optical images of CMP and CNF grown on SiO<sub>2</sub>/Si substrates under different annealing temperature (a) 25 °C, (b) 400 °C, (c) 600 °C, (d) 700 °C, (e) 750 °C and (f) 800 °C, respectively. Scale bar, 20 μm.

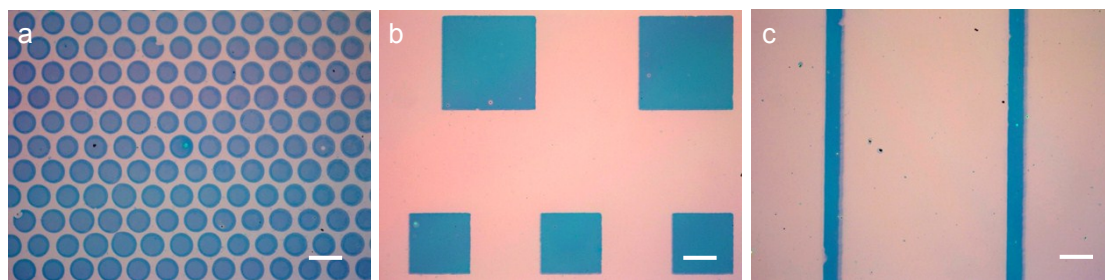

Fig. S2 Optical micrographs of patterned CNFs on SiO<sub>2</sub>/Si substrates, including (a) circular, (b) square, and (c) oblong geometries were prepared by annealing patterned CMP nanofilms. Scale bars: 100 μm.

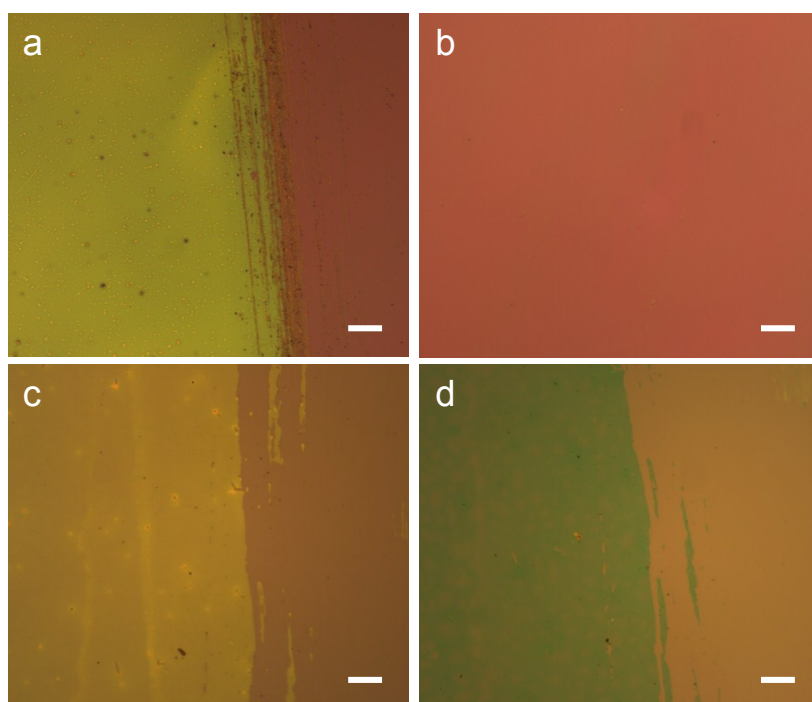

Fig. S3 Optical micrographs of monomers and polymer before and after 800 °C annealing. the spin-coated monomer film on a SiO<sub>2</sub>/Si substrate before (a) and after (b) annealing; the polymer film on a SiO<sub>2</sub>/Si substrate before (c) and after (d) annealing. Scale bar, 40 μm.

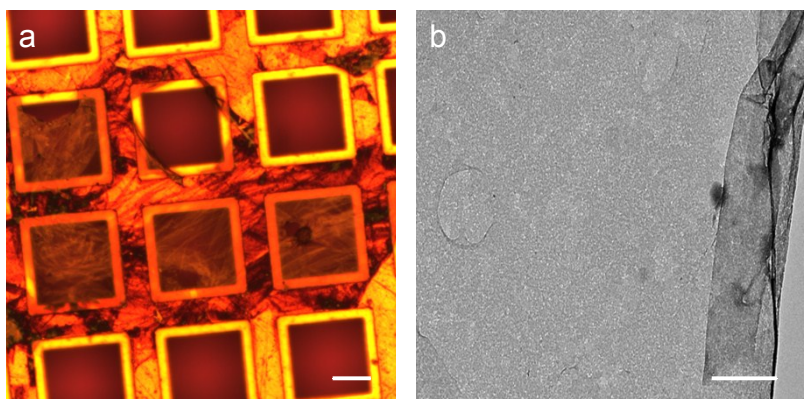

Fig. S4 (a) Optical micrograph of CNF-800. Scale bar, 10  $\mu\text{m}$ . (b) TEM of CNF-800. Scale bar, 1  $\mu\text{m}$ .

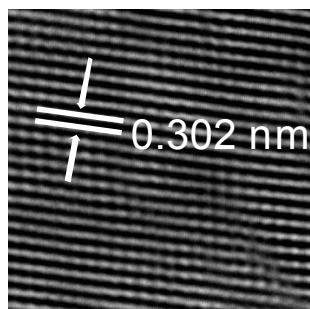

Fig. S5 HRTEM of CDs.

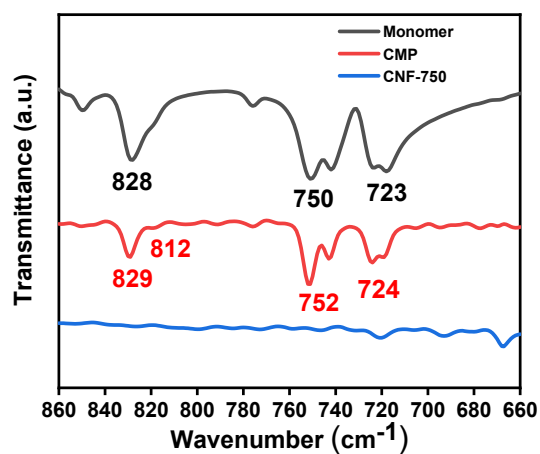

Fig. S6 FTIR spectra of monomer, CMP and CNF-750. The peaks at 723/750  $\text{cm}^{-1}$  and 724/752  $\text{cm}^{-1}$  in monomer and CMP samples can be designated to the vibrational bands of C–H bonds of ortho-bisubstituted carbazole ring. The FTIR peaks at 828  $\text{cm}^{-1}$  in monomer sample and 829  $\text{cm}^{-1}$  in CMP are attributed to the para-disubstituted phenyl ring.

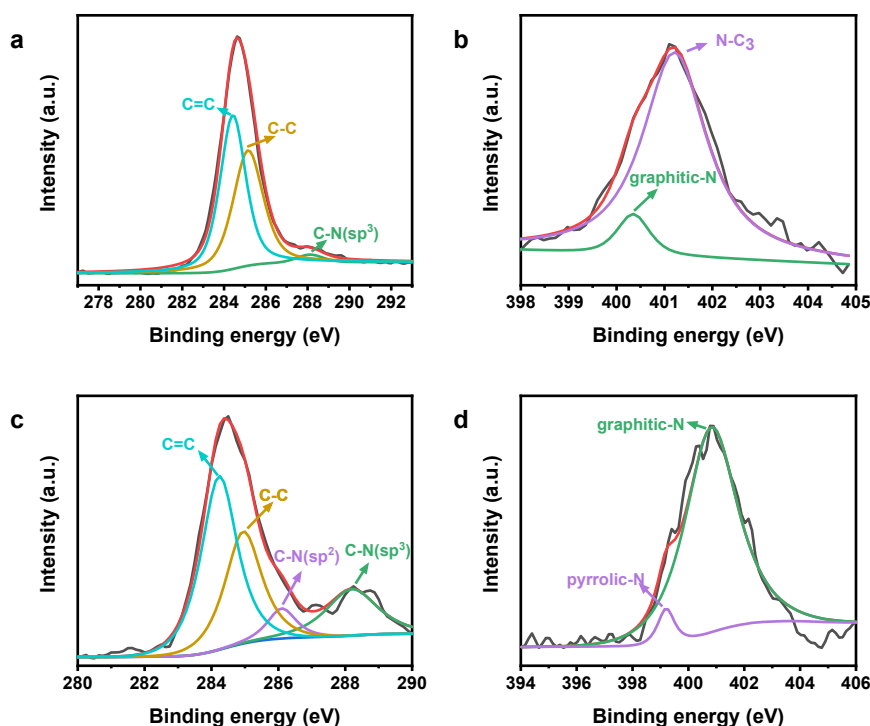

Fig. S7 a) C 1s and b) N 1s of the CMP, c) C 1s and d) N 1s of the CNF-750. The deconvolution of C 1s signal reveals three components centered at 284.5, 285.0 and 288.2 eV (Fig. S7a), which corresponds to C=C, C-C, and C-N (sp<sup>3</sup>), respectively. After annealing at 750 °C, the peak at 284.5 eV corresponds to the graphite-like sp<sup>2</sup> carbon (Fig. S7c), indicating most of carbon atoms are arranged in a conjugated honeycomb lattice.<sup>1</sup> The high content of graphitic-like sp<sup>2</sup> carbon has contributed to the increase of electrical conductivity. The small peaks at 285.0, 286.1 and 288.5 eV are attributed to C-C, C-N (sp<sup>2</sup>) and C-N (sp<sup>3</sup>) (Fig. S7c), respectively. There are two peaks at 400.4 eV and 401.2 eV, which represent graphitic-N and quaternary N (Fig. S7b), respectively. As shown in Fig. S7d, the major part of nitrogen is allocated between pyrrolic-N (at 399.2 eV) and graphitic-N (at 400.8 eV).<sup>2</sup>

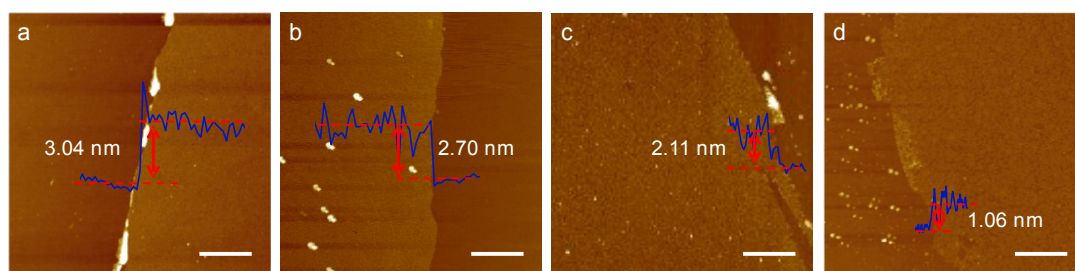

Fig. S8 AFM images of CNF grown on SiO<sub>2</sub>/Si substrates under different annealing temperature. (a) 400 °C, (b) 600 °C, (c) 700 °C and (d) 800 °C, respectively. Scale bar, 1 μm.

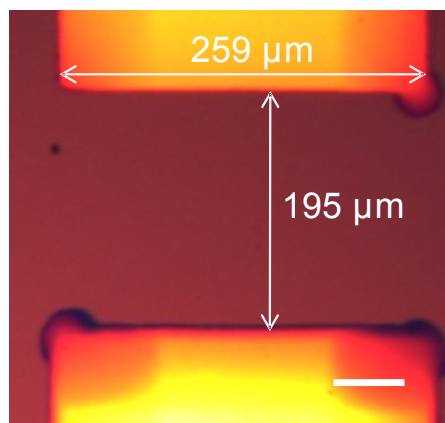

Fig. S9 Optical micrograph of the FET device. Scale bar, 50 μm.

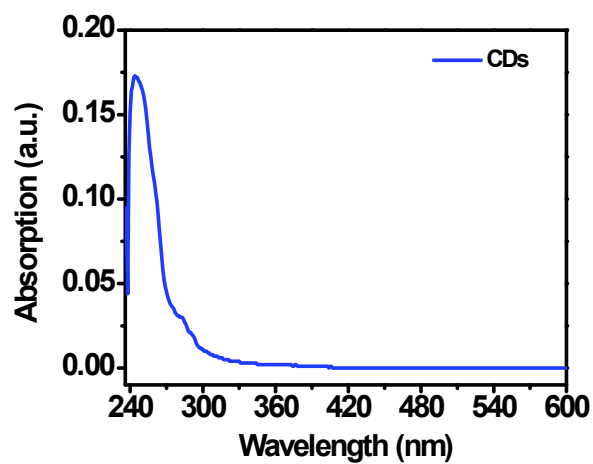

Fig. S10 Normalized UV-vis absorption spectra of CDs.

#### Notes and references

1. R. Li, K. Parvez, F. Hinkel, X. I. Feng, M. Klaus, *Angew. Chem.Int. Edit.*, 2013, **52**, 5535-5538.
2. T. Yuan, Y. S. He, W. Zhang, Z. F. Ma, *Chem. Commun.*, 2016, **52**, 112-115.
